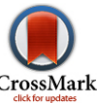

## Correction

# Correction: Gene Silencing of SOCS3 by siRNA Intranasal Delivery Inhibits Asthma Phenotype in Mice

The *PLOS ONE* Staff

The second affiliation for the ninth author is not indicated. Jose M. Zubeldia is affiliated with: Allergy Section and Experimental Medicine Unit, Gregorio Marañón Hospital, Madrid, Spain, and CIBER de Enfermedades Raras (CIBERER-U761), Madrid, Spain.

## Reference

1. Ma Paz Zafra, Mazzeo C, Gámez C, Rodriguez Marco A, de Zulueta A, et al. (2014) Gene Silencing of SOCS3 by siRNA Intranasal Delivery Inhibits Asthma Phenotype in Mice. PLoS ONE 9(3): e91996. doi:10.1371/journal.pone.0091996

**Citation:** The *PLOS ONE* Staff (2014) Correction: Gene Silencing of SOCS3 by siRNA Intranasal Delivery Inhibits Asthma Phenotype in Mice. PLoS ONE 9(8): e105924. doi:10.1371/journal.pone.0105924

**Published:** August 14, 2014

**Copyright:** © 2014 The *PLOS ONE* Staff. This is an open-access article distributed under the terms of the Creative Commons Attribution License, which permits unrestricted use, distribution, and reproduction in any medium, provided the original author and source are credited.
